# Supplementary material for: Self-compassion in Chinese Young Adults: Specific Features of the Construct from a Cultural Perspective
Source: Springer Nature journal article supplement (doi:10.1007/s12671-021-01734-1), 2021-09-04
Supplement: MOESM1 [file 19632498]

Table S1 The focus group discussion statements

| Dimension | Discussion Statement (“When I fail something important,…”) |
| --- | --- |
| Self-Kindness | “…, I give myself the caring I need.” |
| Common Humanity | “…,I try to remind myself that failures are shared by most people.” |
| Mindfulness | “…,I try to keep my emotions in balance.” |
| Self-Judgment | “…,I am critical about myself and dislike my own flaws and inadequacies.” |
| Isolation | “…,I tend to feel that I am the only person that ever fails at anything or gets anything wrong.” |
| Over-Identification | “…, I tend to obsess and fixate on everything that is wrong. ” |

Table S2 Thematic analysis steps

| Steps | Language(s) | Researcher(s) | Reviewer(s) |
| --- | --- | --- | --- |
| Familiar with the data | Chinese | MZ and BW | YL and NS |
| Generating initial codes | Chinese | MZ and BW | YL and NS |
| Searching for themes | Chinese | MZ | NYBW |
| Reviewing themes | Chinese and English | MZ | NYBW and JL |
| Defining and naming themes | English | MZ | AK and JS |
| Producing a report | English | MZ | AK, JS and PW |
